# Supplementary material for: How to Identify Roast Defects in Coffee Beans Based on the Volatile Compound Profile
Source: MDPI journal article supplement (doi:10.3390/molecules27238530), 2022-12-03
Supplement: s1 [file s1]

## Supplementary Materials. Additional information

### Information about coffee: Guatemala SHB ep Huehuetenango

- Coffee Grade: SHB EP
- Grower: Hugo Chávez Mendez
- Farm Size: 0.5 hectares
- Variety: Bourbon,
- Region: San Pedro Necta, Huehuetenango, Western Guatemala
- Harvest: October – March 2020
- Altitude: 1524 - 1650 masl (metres above sea level)
- Soil: Clay minerals
- Process: Fully washed and dried in the sun
- EP (European Preparation) means that the green coffee was sorted by hand to remove any defective beans and foreign material.
